# Supplementary material for: Formation of paratacamite nanomaterials via the conversion of aged and oxidized copper nanoparticles in hydrochloric acidic media
Source: Royal Society of Chemistry journal article supplement (doi:10.1039/c0jm03705b), 2011-01-01
Supplement: c0jm03705b.pdf [file c0jm03705b.pdf]

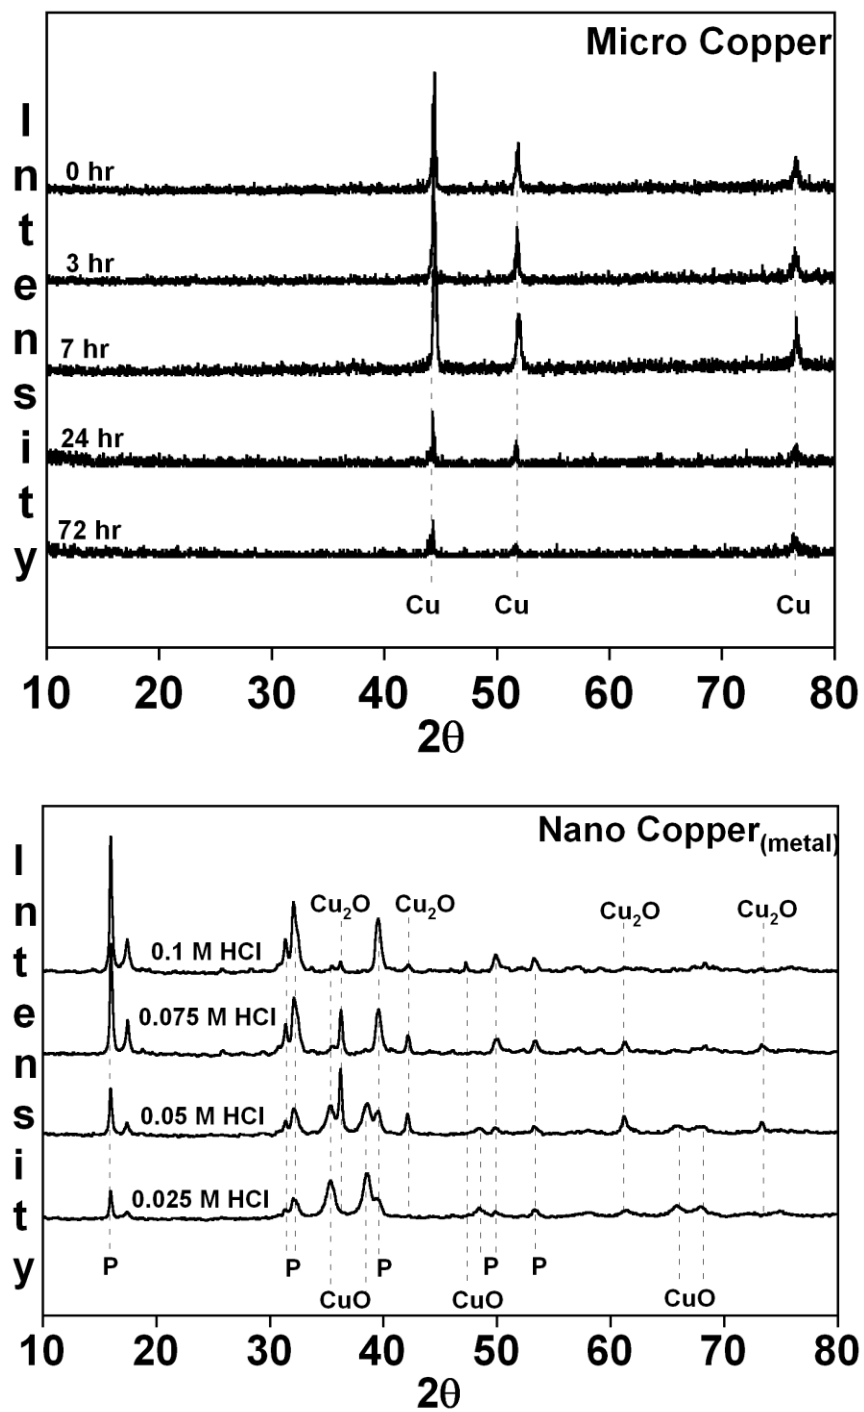

**Figure 1.** XRD patterns for micro copper (upper) and nano copper<sub>(metal)</sub> (lower) samples after oxidation for 0 (initial), 3, 7, 24, and 72 hr.

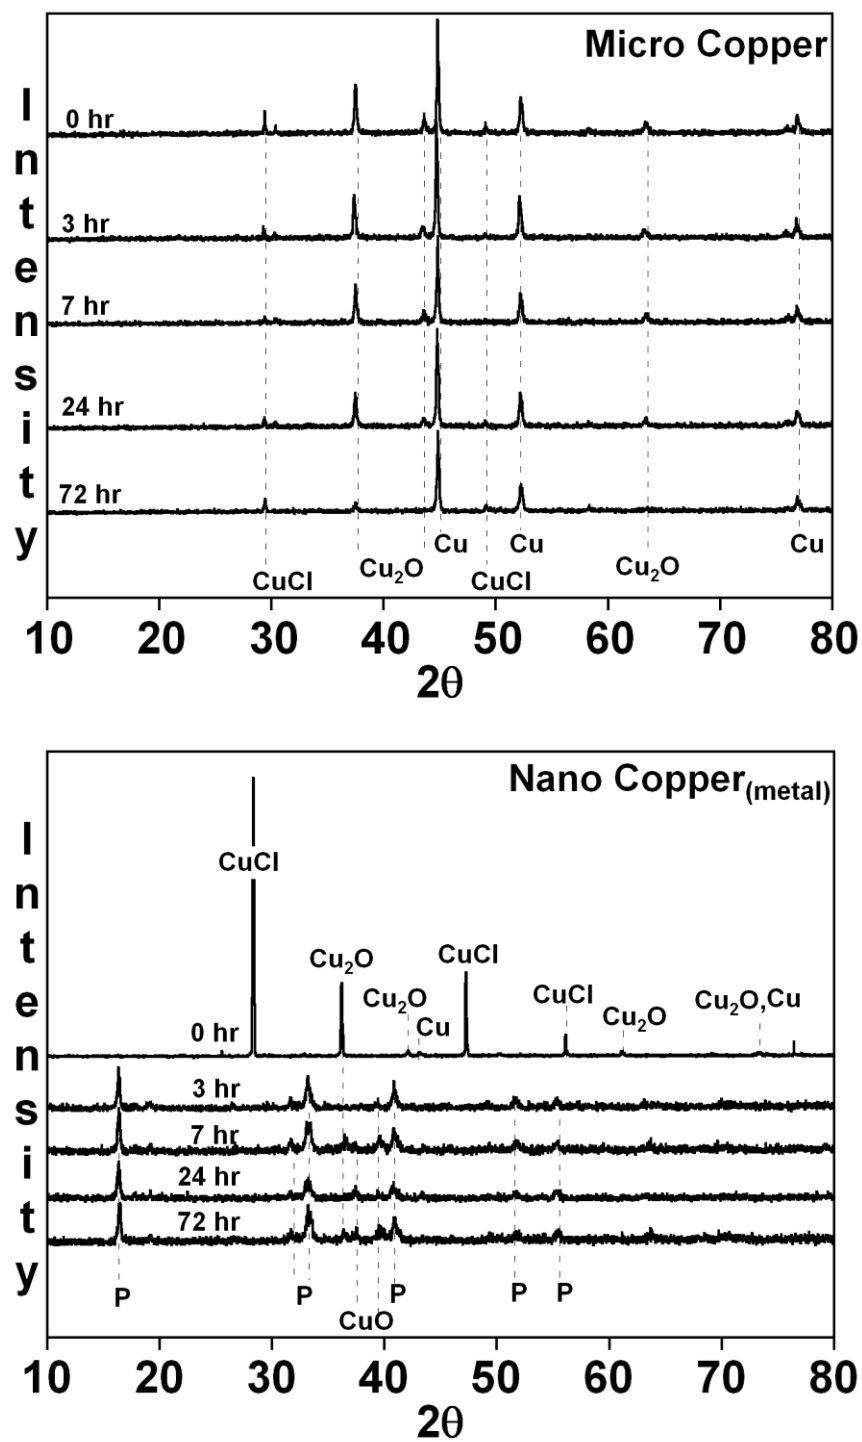

**Figure 2.** XRD patterns for micro copper (upper) and nano copper<sub>(metal)</sub> (lower) samples oxidized for 0 (initial), 3, 7, 24, and 72 hr and reacted with 0.1 M HCl.
